# Supplementary material for: Telerehabilitation for Stroke Survivors: Systematic Review and Meta-Analysis
Source: PubMed Central journal article supplement (PMC6250558; doi:10.2196/10867), 2018-10-26
Supplement: jmir_v20i10e10867_app3.pdf [file jmir_v20i10e10867_app3.pdf]

| <b>Reason(s) for author judgement</b>                                                                                                                                 | <b>Risk of Bias</b> | <b>Supplementary File 3: Risk of bias assessment in included randomized controlled trialsXBoter et al. 2014</b> |
|-----------------------------------------------------------------------------------------------------------------------------------------------------------------------|---------------------|-----------------------------------------------------------------------------------------------------------------|
| A minimization procedure was performed to reduce imbalance in the distributions of treatment numbers within the levels of each individual possible prognostic factor. | Low                 | Random sequence generation                                                                                      |
| Not reported but unlikely to have happened given the nature of the intervention                                                                                       | High                | Blinding of patients                                                                                            |
| The assessment by telephone was performed in a blinded fashion.                                                                                                       | Low                 | Blinding of outcome assessors                                                                                   |
| Allocation was done by means of a central telephone service                                                                                                           | Low                 | Concealment of allocation                                                                                       |
| The percentage of patient withdrawal was less than 10% and an intention to treat analysis was performed                                                               | Low                 | Incomplete data reporting                                                                                       |
| All assigned outcomes were adequately reported                                                                                                                        | Low                 | Selective outcome reporting                                                                                     |
|                                                                                                                                                                       | Unclear             | Others                                                                                                          |
| <b>Reason(s) for author judgement</b>                                                                                                                                 | <b>Risk of Bias</b> | <b>Chen et al. 2017</b>                                                                                         |
| A blocked randomization sequence was computer generated                                                                                                               | Low                 | Random sequence generation                                                                                      |
| In this study, given the nature of the intervention, it was impossible to blind the survivors, the caregivers, and the therapists about allocation and intervention   | High                | Blinding of patients                                                                                            |
| Only outcome assessors and statisticians were blinded                                                                                                                 | Low                 | Blinding of outcome assessors                                                                                   |
| Allocation concealment was ensured, as allocation information was protected in opaque sealed envelopes                                                                | Low                 | Concealment of allocation                                                                                       |
| The percentage of patient withdrawal was less than 10% and an intention to treat analysis was performed                                                               | Low                 | Incomplete data reporting                                                                                       |
| All assigned outcomes were adequately reported                                                                                                                        | Low                 | Selective outcome reporting                                                                                     |
|                                                                                                                                                                       | Unclear             | Others                                                                                                          |
| <b>Reason(s) for author judgement</b>                                                                                                                                 | <b>Risk of Bias</b> | <b>Chumbler et al. 2012</b>                                                                                     |
| Eligible study participants were randomized by centrally sealed allocation into the STeleR or usual care (UC) groups.                                                 | Low                 | Random sequence generation                                                                                      |
| The study was a 3-site, 2-arm, single-blinded RCT                                                                                                                     | High                | Blinding of patients                                                                                            |
| Through telephone interview by a research assistant blinded to randomization, and through the medical record.                                                         | Low                 | Blinding of outcome assessors                                                                                   |
| Eligible study participants were randomized by centrally sealed allocation into the STeleR or usual care (UC) groups.                                                 | Low                 | Concealment of allocation                                                                                       |
| Intention-to-treat analyses were used for all outcomes.                                                                                                               | Low                 | Incomplete data reporting                                                                                       |
| All assigned outcomes were adequately reported                                                                                                                        | Low                 | Selective outcome reporting                                                                                     |
|                                                                                                                                                                       | Unclear             | Others                                                                                                          |
| <b>Reason(s) for author judgement</b>                                                                                                                                 | <b>Risk of Bias</b> | <b>Fordeucey et al. 2012</b>                                                                                    |
| Following screening and informed consent, each subject was randomly assigned into either the intervention (videophone technology) or the control (standard home care) | Unclear             | Random sequence generation                                                                                      |
| Not reported but unlikely to have happened given the nature of the intervention                                                                                       | High                | Blinding of patients                                                                                            |
| Not reported                                                                                                                                                          | Unclear             | Blinding of outcome assessors                                                                                   |

|                                                                                                                                                                                                                |                     |                               |
|----------------------------------------------------------------------------------------------------------------------------------------------------------------------------------------------------------------|---------------------|-------------------------------|
| Not reported                                                                                                                                                                                                   | Unclear             | Concealment of allocation     |
| Two patients withdrawn and not reported if have been included in an intenton to treat analysis                                                                                                                 | High                | Incomplete data reporting     |
|                                                                                                                                                                                                                | Unclear             | Selective outcome reporting   |
|                                                                                                                                                                                                                | Unclear             | Others                        |
| <b>Reason(s) for author judgement</b>                                                                                                                                                                          | <b>Risk of Bias</b> | <b>Huijgen et al. 2008</b>    |
| Each time HCAD was available, three patients were randomly assigned: two to the intervention group and the other one to the control group. The randomization was performed at each individual clinical centre. | Unclear             | Random sequence generation    |
| Not reported but unlikely to have happened given the nature of the intervention                                                                                                                                | High                | Blinding of patients          |
| Not reported                                                                                                                                                                                                   | Unclear             | Blinding of outcome assessors |
| Not reported                                                                                                                                                                                                   | Unclear             | Concealment of allocation     |
| For all analyses an intention-to-treat analysis, including patients with protocol deviations was performed.                                                                                                    | Low                 | Incomplete data reporting     |
| All assigned outcomes were adequately reported                                                                                                                                                                 | Low                 | Selective outcome reporting   |
|                                                                                                                                                                                                                | Unclear             | Others                        |
| <b>Reason(s) for author judgement</b>                                                                                                                                                                          | <b>Risk of Bias</b> | <b>Lin et al. 2014</b>        |
| The randomization was performed by random numbers which were generated by computer.                                                                                                                            | Low                 | Random sequence generation    |
| Not reported but unlikely to have happened given the nature of the intervention                                                                                                                                | High                | Blinding of patients          |
| One physical therapist performed the pre- and post-assessments for both groups and blinded to the assignment.                                                                                                  | Low                 | Blinding of outcome assessors |
| The rater was blinded to the allocation of participants.                                                                                                                                                       | Low                 | Concealment of allocation     |
| Analyses of intention to treat were used for one drop-out.                                                                                                                                                     | Low                 | Incomplete data reporting     |
| All assigned outcomes were adequately reported                                                                                                                                                                 | Low                 | Selective outcome reporting   |
|                                                                                                                                                                                                                | Unclear             | Others                        |
| <b>Reason(s) for author judgement</b>                                                                                                                                                                          | <b>Risk of Bias</b> | <b>Linder et al. 2015</b>     |
| The method of randomization is not adequately reported                                                                                                                                                         | Unclear             | Random sequence generation    |
| A prospective, multisite, single-blind, randomized controlled clinical trial was designed                                                                                                                      | High                | Blinding of patients          |
| All evaluations were completed by a physical therapist or occupational therapist blinded to group assignment at baseline and end of treatment (EOT).                                                           | Low                 | Blinding of outcome assessors |
| Not reported                                                                                                                                                                                                   | Unclear             | Concealment of allocation     |
| For the purposes of this intent-to-treat analysis, data were assumed to be missing at random.                                                                                                                  | Low                 | Incomplete data reporting     |
| All assigned outcomes were adequately reported                                                                                                                                                                 | Low                 | Selective outcome reporting   |
|                                                                                                                                                                                                                | Unclear             | Others                        |
| <b>Reason(s) for author judgement</b>                                                                                                                                                                          | <b>Risk of Bias</b> | <b>Llorens et al. 2014</b>    |
| Randomization was computer-generated using a basic random number generator in a ratio of 1:1.                                                                                                                  | Low                 | Random sequence generation    |
| Single-blind randomized controlled trial.                                                                                                                                                                      | High                | Blinding of patients          |
| A physical therapist (PTA), blind to the intervention, was responsible for assessing the participants and for supervising and adjusting their                                                                  | Low                 | Blinding of outcome assessors |

|                                                                                                                                                                                                 |                     |                               |
|-------------------------------------------------------------------------------------------------------------------------------------------------------------------------------------------------|---------------------|-------------------------------|
| training.                                                                                                                                                                                       |                     |                               |
| The allocation sequence was concealed from an independent researcher. A sealed envelope identifying the group of each participant was given to the therapists to inform them of the allocation. | Low                 | Concealment of allocation     |
| Only one patient dropped out from the study                                                                                                                                                     | Low                 | Incomplete data reporting     |
| All assigned outcomes were adequately reported                                                                                                                                                  | Low                 | Selective outcome reporting   |
|                                                                                                                                                                                                 | Unclear             | Others                        |
| <b>Reason(s) for author judgement</b>                                                                                                                                                           | <b>Risk of Bias</b> | <b>Mayo et al. 2008</b>       |
| Randomization was done at discharge, in random blocks of four, six or eight                                                                                                                     | Low                 | Random sequence generation    |
| A stratified, balanced, evaluator-blinded, randomized clinical trial was carried out                                                                                                            | High                | Blinding of patients          |
| A stratified, balanced, evaluator-blinded, randomized clinical trial was carried out                                                                                                            | Low                 | Blinding of outcome assessors |
| Sealed envelopes were prepared in advance                                                                                                                                                       | Low                 | Concealment of allocation     |
| with an 'intention-to-treat' approach using linear regression                                                                                                                                   | Low                 | Incomplete data reporting     |
| All assigned outcomes were adequately reported                                                                                                                                                  | Low                 | Selective outcome reporting   |
|                                                                                                                                                                                                 | Unclear             | Others                        |
| <b>Reason(s) for author judgement</b>                                                                                                                                                           | <b>Risk of Bias</b> | <b>Piron et al. 2008</b>      |
| Using simple randomization, the subjects were assigned to two different groups of five patients.                                                                                                | Low                 | Random sequence generation    |
| Not reported but unlikely to have happened given the nature of the intervention                                                                                                                 | High                | Blinding of patients          |
| The examining physician was blind to the type of treatment given and evaluated arm motor performance in all patients, both before and after therapy                                             | Low                 | Blinding of outcome assessors |
| Not adequately reported                                                                                                                                                                         | Unclear             | Concealment of allocation     |
| No patients withdrawn from the study                                                                                                                                                            | Low                 | Incomplete data reporting     |
| All assigned outcomes were adequately reported                                                                                                                                                  | Low                 | Selective outcome reporting   |
|                                                                                                                                                                                                 | Unclear             | Others                        |
| <b>Reason(s) for author judgement</b>                                                                                                                                                           | <b>Risk of Bias</b> | <b>Piron et al. 2009</b>      |
| Selected patients were assigned to 2 groups according to a simple randomization technique using sequentially numbered, opaque sealed envelopes                                                  | Low                 | Random sequence generation    |
| Randomized single-blind controlled trial.                                                                                                                                                       | High                | Blinding of patients          |
| The examining neurologist was blind to the treatments administered to the patients.                                                                                                             | Low                 | Blinding of outcome assessors |
| Selected patients were assigned to 2 groups according to a simple randomization technique using sequentially numbered, opaque sealed envelopes                                                  | Low                 | Concealment of allocation     |
| Data on patient withdrawal or intention to treat analysis are not reported                                                                                                                      | Unclear             | Incomplete data reporting     |
| All assigned outcomes were adequately reported                                                                                                                                                  | Low                 | Selective outcome reporting   |
|                                                                                                                                                                                                 | Unclear             | Others                        |
| <b>Reason(s) for author judgement</b>                                                                                                                                                           | <b>Risk of Bias</b> | <b>Redzuan et al. 2012</b>    |
| A blocked randomization sequence (block of 10) was generated using a computer program                                                                                                           | Low                 | Random sequence generation    |
| Given the nature of the intervention, it was not possible to blind                                                                                                                              | High                | Blinding of patients          |

|                                                                                                                                                                                                                                                       |                     |                                 |
|-------------------------------------------------------------------------------------------------------------------------------------------------------------------------------------------------------------------------------------------------------|---------------------|---------------------------------|
| participants and caregivers from knowing what group they were in.                                                                                                                                                                                     |                     |                                 |
| The randomization list was kept by 1 of the investigators who was involved in patient recruitment and assessment.                                                                                                                                     | High                | Blinding of outcome assessors   |
| The randomization list was kept by 1 of the investigators who was involved in patient recruitment and assessment.                                                                                                                                     | High                | Concealment of allocation       |
| Sixteen patients withdrawn and were not included in the analysis                                                                                                                                                                                      | High                | Incomplete data reporting       |
| All assigned outcomes were adequately reported                                                                                                                                                                                                        | Low                 | Selective outcome reporting     |
|                                                                                                                                                                                                                                                       | Unclear             | Others                          |
| <b>Reason(s) for author judgement</b>                                                                                                                                                                                                                 | <b>Risk of Bias</b> | <b>Smith et al. 2012</b>        |
| Randomization was conducted via computer by PP.                                                                                                                                                                                                       | Low                 | Random sequence generation      |
| Not reported but unlikely to have happened given the nature of the intervention                                                                                                                                                                       | High                | Blinding of patients            |
| Assessors were blind to condition                                                                                                                                                                                                                     | Low                 | Blinding of outcome assessors   |
| Allocation involved a permuted block design with blocks of random length so that the final sample included 16 dyads per condition.                                                                                                                    | Low                 | Concealment of allocation       |
| Data were thus analyzed separately in terms of both intent to treat                                                                                                                                                                                   | Low                 | Incomplete data reporting       |
| All assigned outcomes were adequately reported                                                                                                                                                                                                        | Low                 | Selective outcome reporting     |
|                                                                                                                                                                                                                                                       | Unclear             | Others                          |
| <b>Reason(s) for author judgement</b>                                                                                                                                                                                                                 | <b>Risk of Bias</b> | <b>van der Berg et al. 2016</b> |
| A statistician external to the study generated the random sequence in random blocks of 2 to 6 using a computer software program                                                                                                                       | Low                 | Random sequence generation      |
| Participants and treating physiotherapists could not be masked to intervention group allocation.                                                                                                                                                      | High                | Blinding of patients            |
| By an independent assessor blinded to allocation.                                                                                                                                                                                                     | Low                 | Blinding of outcome assessors   |
| Created sequentially numbered, sealed opaque envelopes containing group allocation for participants.                                                                                                                                                  | Low                 | Concealment of allocation       |
| Data were analyzed according to the intention-to-treat principle, with the statistician masked to group allocation.                                                                                                                                   | Low                 | Incomplete data reporting       |
| Outcome measures have been detailed and fully referenced in a previously published protocol paper                                                                                                                                                     | Low                 | Selective outcome reporting     |
|                                                                                                                                                                                                                                                       | Unclear             | Others                          |
| <b>Reason(s) for author judgement</b>                                                                                                                                                                                                                 | <b>Risk of Bias</b> | <b>Wolf et al. 2015</b>         |
| An adaptive, stratified, computer-driven randomization procedure was used for group assignment to balance critical participant characteristics                                                                                                        | Low                 | Random sequence generation      |
| The protocol and design for this prospective, multisite, single-blind, randomized controlled clinical trial have been described in our previous publication                                                                                           | High                | Blinding of patients            |
| Participants were assessed before randomization (T1) and after completion of the intervention (T2) by occupational/ physical therapists who were trained in the use of standardized assessment protocols and blinded to participant group assignment. | Low                 | Blinding of outcome assessors   |
| Not reported                                                                                                                                                                                                                                          | Unclear             | Concealment of allocation       |
| For purposes of this intent-to-treat analysis, we assumed that data were missing at random                                                                                                                                                            | Low                 | Incomplete data reporting       |
| All assigned outcomes were adequately reported                                                                                                                                                                                                        | Low                 | Selective outcome reporting     |
|                                                                                                                                                                                                                                                       | Unclear             | Others                          |
